# Supplementary material for: Long‐Term Cardiovascular Risk After Radiotherapy in Women With Breast Cancer
Source: PubMed Central journal article supplement (PMC5524103; doi:10.1161/jaha.117.005633), 2017-05-21
Supplement: JAH3-6-e005633-s001.pdf [file JAH3-6-e005633-s001.pdf]

# **Supplemental Material**

**Table S1. Studies included in the meta-analysis that assessed cardiac morbidity and mortality associated with breast cancer radiotherapy.**

| <b>Study</b>                                   | <b>Country</b> | <b>Treatment period</b> | <b>Study type</b>            | <b>Study design</b>                                                            | <b>End points</b>                                                      | <b>Source of participants</b> |
|------------------------------------------------|----------------|-------------------------|------------------------------|--------------------------------------------------------------------------------|------------------------------------------------------------------------|-------------------------------|
| <b>Prospective randomized controlled trial</b> |                |                         |                              |                                                                                |                                                                        |                               |
| EBCTCG report <sup>1</sup>                     | Multi-national | 1985-2000               | Randomized controlled trial  | Radiotherapy vs. without radiotherapy                                          | Death from any cause; cardiac mortality                                | Population-based              |
| Valagussa P <sup>2</sup>                       | Italy          | 1980-1990               | Randomized controlled trial  | Left-sided vs. right-sided radiotherapy; radiotherapy vs. without radiotherapy | Coronary heart disease; arrhythmia                                     | Hospital-based                |
| Woodward WA <sup>3</sup>                       | USA            | 1975-1994               | Randomized controlled trials | Radiotherapy vs. without radiotherapy                                          | Death from myocardial infarction                                       | Hospital-based                |
| Stockholm Breast Cancer Trial <sup>4</sup>     | Sweden         | 1971-1976               | Randomized controlled trial  | Radiotherapy vs. without radiotherapy                                          | Death from any cause; cardiac death; death from coronary heart disease | Hospital-based                |
| Cuzick J <sup>5</sup>                          | UK             | 1949-1974               | Randomized controlled trial  | Left-sided vs. right-sided radiotherapy; radiotherapy vs. without radiotherapy | Cardiac mortality                                                      | Hospital-based                |
| SSBCG Trial <sup>6</sup>                       | Sweden         | 1978-1985               | Randomized controlled trial  | Left-sided vs. right-sided radiotherapy; Radiotherapy vs. without radiotherapy | Cardiac mortality                                                      | Hospital-based                |
| DBCG 82b and 82c                               | Denmark        | 1982-1990               | Randomized controlled        | Left-sided vs. right-sided                                                     | Death from any cause;                                                  | Hospital-based                |

|                                                         |        |           |                             |                                                                                |                                                                                                                    |                  |
|---------------------------------------------------------|--------|-----------|-----------------------------|--------------------------------------------------------------------------------|--------------------------------------------------------------------------------------------------------------------|------------------|
| Trials <sup>7</sup>                                     |        |           | trial                       | radiotherapy; radiotherapy vs. without radiotherapy                            | death from coronary heart disease; death from myocardial infarction; coronary heart disease; myocardial infarction |                  |
| Cancer Research Campaign Trial <sup>8</sup>             | UK     | 1970-1980 | Randomized controlled trial | Left-sided vs. right-sided radiotherapy; radiotherapy vs. without radiotherapy | Death from any cause; cardiac mortality                                                                            | Hospital-based   |
| Oslo study <sup>9</sup>                                 | Norway | 1964-1972 | Randomized controlled trial | Radiotherapy vs. without radiotherapy                                          | Cardiac mortality; death form myocardial infarction                                                                | Hospital-based   |
| CRC Trial <sup>10</sup>                                 | UK     | 1970-1975 | Randomized controlled trial | Left-sided vs. right-sided radiotherapy; radiotherapy vs. without radiotherapy | Death from any cause; cardiac mortality                                                                            | Hospital-based   |
| Jones JM <sup>11</sup>                                  | UK     | 1949-1955 | Prospective cohort          | Radiotherapy vs. without radiotherapy                                          | Cardiac mortality                                                                                                  | Hospital-based   |
| NCCTG Trial <sup>12</sup>                               | USA    | 2000-2005 | Randomized controlled trial | Radiotherapy vs. without radiotherapy                                          | Cardiac mortality; chronic heart failure                                                                           | Hospital-based   |
| <b>Population-based tumor registry/database reviews</b> |        |           |                             |                                                                                |                                                                                                                    |                  |
| <b>Ontario cancer registry</b>                          |        |           |                             |                                                                                |                                                                                                                    |                  |
| Paszat LF <sup>13</sup>                                 | Canada | 1973-1992 | Prospective cohort          | Left-sided vs. right-sided                                                     | Death from                                                                                                         | Population-based |

|                                   |                |           |                    |                                                                                |                                                                                                              |                  |
|-----------------------------------|----------------|-----------|--------------------|--------------------------------------------------------------------------------|--------------------------------------------------------------------------------------------------------------|------------------|
|                                   |                |           |                    | radiotherapy                                                                   | myocardial infarction                                                                                        |                  |
| <b>SEER database cohort study</b> |                |           |                    |                                                                                |                                                                                                              |                  |
| Patt DA <sup>14</sup>             | Multi-national | 1986-1993 | Prospective cohort | Left-sided vs. right-sided radiotherapy                                        | Coronary heart disease; chronic heart failure; valvular heart disease; arrhythmia                            | Population-based |
| Pinder MC <sup>15</sup>           | Multi-national | 1992-2002 | Prospective cohort | Left-sided vs. right-sided radiotherapy; Radiotherapy vs. without radiotherapy | Chronic heart failure                                                                                        | Population-based |
| Harlan LC <sup>16</sup>           | USA            | 1996-1999 | Prospective cohort | Radiotherapy vs. without radiotherapy                                          | Chronic heart failure; myocardial infarction                                                                 | Population-based |
| Darby SC <sup>17</sup>            | Multi-national | 1973-2001 | Prospective cohort | Left-sided vs. right-sided radiotherapy                                        | Death from any cause; cardiac mortality; death from coronary heart disease; death from myocardial infarction | Population-based |
| Henson KE <sup>18</sup>           | Multi-national | 1973-2008 | Prospective cohort | Left-sided vs. right-sided radiotherapy                                        | Cardiac mortality                                                                                            | Population-based |
| Jacobson JS <sup>19</sup>         | Multi-national | 1982-1990 | Prospective cohort | Left-sided vs. right-sided radiotherapy; radiotherapy vs. without radiotherapy | Coronary heart disease; myocardial infarction                                                                | Population-based |
| Giordano SH <sup>20</sup>         | USA            | 1973-2000 | Prospective cohort | Left-sided vs. right-sided radiotherapy                                        | Death from coronary heart disease                                                                            | Population-based |
| <b>Swedish Cancer</b>             |                |           |                    |                                                                                |                                                                                                              |                  |

|                                                   |             |           |                    |                                                                                |                                                                                                               |                  |
|---------------------------------------------------|-------------|-----------|--------------------|--------------------------------------------------------------------------------|---------------------------------------------------------------------------------------------------------------|------------------|
| <b>Registry</b>                                   |             |           |                    |                                                                                |                                                                                                               |                  |
| Rutqvist LE <sup>21</sup>                         | Sweden      | 1970-1986 | Prospective cohort | Left-sided vs. right-sided radiotherapy                                        | Death from any cause; cardiac mortality; death from myocardial infarction                                     | Population-based |
| <b>Stockholm Breast Cancer Study Group</b>        |             |           |                    |                                                                                |                                                                                                               |                  |
| Gyenes G <sup>22</sup>                            | Sweden      | 1971-1976 | Prospective cohort | Radiotherapy vs. without radiotherapy                                          | Cardiac mortality; death from coronary heart disease; death from myocardial infarction; myocardial infarction | Hospital-based   |
| Rutqvist LE <sup>23</sup>                         | Sweden      | 1976-1987 | Prospective cohort | Left-sided vs. right-sided radiotherapy; radiotherapy vs. without radiotherapy | Myocardial infarction; death from myocardial infarction                                                       | Population-based |
| <b>Thames Cancer Registry</b>                     |             |           |                    |                                                                                |                                                                                                               |                  |
| Roychoudhuri R <sup>24</sup>                      | UK          | 1971-1998 | Prospective cohort | Left-sided vs. right-sided radiotherapy; radiotherapy vs. without radiotherapy | Death from any cause; cardiac mortality; death from coronary heart disease                                    | Population-based |
| <b>Swedish National Cancer Registry and DBCCG</b> |             |           |                    |                                                                                |                                                                                                               |                  |
| McGale P <sup>25</sup>                            | Denmark and | 1976-2006 | Prospective cohort | Left-sided vs. right-sided                                                     | Cardiac mortality;                                                                                            | Population-based |

|                                    |                    |           |                    |                                                                                |                                                                                                                                                                               |                  |
|------------------------------------|--------------------|-----------|--------------------|--------------------------------------------------------------------------------|-------------------------------------------------------------------------------------------------------------------------------------------------------------------------------|------------------|
|                                    | Sweden             |           |                    | radiotherapy                                                                   | death from coronary heart disease; death from myocardial infarction; coronary heart disease; myocardial infarction; chronic heart failure; valvular heart disease; arrhythmia |                  |
| Darby SC <sup>26</sup>             | Denmark and Sweden | 1958-2001 | Case-control       | Left-sided vs. right-sided radiotherapy; radiotherapy vs. without radiotherapy | Coronary heart disease; death from coronary heart disease                                                                                                                     | Population-based |
| <b>NSW Central Cancer Registry</b> |                    |           |                    |                                                                                |                                                                                                                                                                               |                  |
| Wang W <sup>27</sup>               | Australia          | 1995      | Prospective cohort | Left-sided vs. right-sided vs. without radiotherapy                            | Death from any cause; cardiac mortality; death from coronary heart disease; death from valvular heart disease; death from chronic heart failure                               | Hospital-based   |
| <b>Geneva Cancer Registry</b>      |                    |           |                    |                                                                                |                                                                                                                                                                               |                  |
| Bouchardy C <sup>28</sup>          | Switzerland        | 1980-2004 | Prospective cohort | Left-sided vs. right-sided radiotherapy                                        | Death from any cause; cardiac mortality                                                                                                                                       | Population-based |
| <b>BCCA study</b>                  |                    |           |                    |                                                                                |                                                                                                                                                                               |                  |

|                                                |             |           |                      |                                                                                |                                                                                                                            |                  |
|------------------------------------------------|-------------|-----------|----------------------|--------------------------------------------------------------------------------|----------------------------------------------------------------------------------------------------------------------------|------------------|
| Stokes EL <sup>29</sup>                        | Canada      | 1990-1996 | Retrospective cohort | Left-sided vs. right-sided radiotherapy                                        | Cardiac mortality                                                                                                          | Population-based |
| <b>NRH radiation therapy registry</b>          |             |           |                      |                                                                                |                                                                                                                            |                  |
| Tjessem KH <sup>30</sup>                       | Norway      | 1975-1991 | Prospective cohort   | Left-sided vs. right-sided radiotherapy                                        | Death from coronary heart disease                                                                                          | Population-based |
| <b>Dutch Late Effects Breast Cancer Cohort</b> |             |           |                      |                                                                                |                                                                                                                            |                  |
| Hooning MJ <sup>31</sup>                       | Netherlands | 1970-1986 | Prospective cohort   | Left-sided vs. right-sided radiotherapy; radiotherapy vs. without radiotherapy | Coronary heart disease; myocardial infarction; chronic heart failure; valvular heart disease                               | Population-based |
| <b>Dutch population-based DCIS cohort</b>      |             |           |                      |                                                                                |                                                                                                                            |                  |
| Boekel NB <sup>32</sup>                        | Netherlands | 1989-2004 | Prospective cohort   | Left-sided vs. right-sided radiotherapy; radiotherapy vs. without radiotherapy | Cardiac mortality; coronary heart disease; myocardial infarction; chronic heart failure arrhythmia; valvular heart disease | Population-based |
| <b>National Cancer Database</b>                |             |           |                      |                                                                                |                                                                                                                            |                  |
| Rutter CE <sup>33</sup>                        | USA         | 1998-2006 | Prospective cohort   | Left-sided vs. right-sided                                                     | Death from any cause                                                                                                       | Population-based |

|                                               |                |           |                      |                                         |                                                                                                                                      |                |
|-----------------------------------------------|----------------|-----------|----------------------|-----------------------------------------|--------------------------------------------------------------------------------------------------------------------------------------|----------------|
|                                               |                |           |                      | radiotherapy                            |                                                                                                                                      |                |
| <b>Single and Multi-institutional reviews</b> |                |           |                      |                                         |                                                                                                                                      |                |
| Vallis KA <sup>34</sup>                       | USA            | 1982-1988 | Retrospective cohort | Left-sided vs. right-sided radiotherapy | Death from any cause; death from myocardial infarction; myocardial infarction                                                        | Hospital-based |
| Gutt R <sup>35</sup>                          | USA            | 1980-1994 | Retrospective cohort | Left-sided vs. right-sided radiotherapy | Cardiac mortality; death from coronary heart disease; death from chronic heart failure                                               | Hospital-based |
| Park CK <sup>36</sup>                         | USA            | 1986-1992 | Retrospective cohort | Left-sided vs. right-sided radiotherapy | Death from any cause; cardiac mortality; Coronary heart disease; chronic heart failure; arrhythmia                                   | Hospital-based |
| Borger JH <sup>37</sup>                       | Multi-national | 1980-1993 | Prospective cohort   | Left-sided vs. right-sided radiotherapy | Death from any cause; cardiac mortality; death from coronary heart disease; death from myocardial infarction; coronary heart disease | Hospital-based |
| Dubois C <sup>38</sup>                        | Belgium        | 1998-2005 | Case-control         | Radiotherapy vs. without                | Cardiac mortality;                                                                                                                   | Hospital-based |



|                          |             |           |                      |                                                                                |                                                                                                                                                                                                                       |                  |
|--------------------------|-------------|-----------|----------------------|--------------------------------------------------------------------------------|-----------------------------------------------------------------------------------------------------------------------------------------------------------------------------------------------------------------------|------------------|
|                          |             |           |                      | radiotherapy                                                                   | myocardial infarction                                                                                                                                                                                                 |                  |
| Correa CR <sup>39</sup>  | USA         | 1977-1995 | Prospective cohort   | Left-sided vs. right-sided radiotherapy                                        | Coronary heart disease                                                                                                                                                                                                | Hospital-based   |
| Hooning MJ <sup>40</sup> | Netherlands | 1970-1975 | Prospective cohort   | Radiotherapy vs. without radiotherapy                                          | Cardiac mortality                                                                                                                                                                                                     | Hospital-based   |
| Harris EE <sup>41</sup>  | USA         | 1997-1994 | Retrospective cohort | Left-sided vs. right-sided radiotherapy                                        | Death from any cause; cardiac mortality; death from myocardial infarction; death from chronic heart failure; coronary heart disease; myocardial infarction; chronic heart failure; valvular heart disease; arrhythmia | Population-based |
| Bouillon K <sup>42</sup> | Sweden      | 1954-1984 | Retrospective cohort | Left-sided vs. right-sided radiotherapy; radiotherapy vs. without radiotherapy | Cardiac mortality; death from coronary heart disease; death from chronic heart failure; death from valvular heart disease; arrhythmia                                                                                 | Population-based |
| Boerman LM <sup>43</sup> | Netherlands | 1970-2006 | Case-control         | Radiotherapy vs. without radiotherapy                                          | Coronary heart disease                                                                                                                                                                                                | Population-based |
| Nixon AJ <sup>44</sup>   | USA         | 1968-1986 | Prospective cohort   | Left-sided vs. right-sided radiotherapy                                        | Death from any cause; cardiac mortality                                                                                                                                                                               | Hospital-based   |

|                        |        |           |                    |                                                                                |                                               |                  |
|------------------------|--------|-----------|--------------------|--------------------------------------------------------------------------------|-----------------------------------------------|------------------|
| Jagsi R <sup>45</sup>  | USA    | 1984-2000 | Prospective cohort | Left-sided vs. right-sided radiotherapy                                        | Coronary heart disease; myocardial infarction | Hospital-based   |
| Causa L <sup>46</sup>  | France | 2003-2007 | Prospective cohort | Radiotherapy vs. without radiotherapy                                          | Coronary heart disease                        | Hospital-based   |
| Geiger A <sup>47</sup> | USA    | 1980-2000 | Case-control       | Left-sided vs. right-sided radiotherapy; radiotherapy vs. without radiotherapy | Myocardial infarction                         | Population-based |

**Table S2. The quality assessment of included cohort studies using the Newcastle-Ottawa scale.**

|                               | <b>Selection</b>                     |                                 |                           |                                                                          | <b>Comparability</b> |                                                                           | <b>Outcome</b>        |                  |                        |                     |
|-------------------------------|--------------------------------------|---------------------------------|---------------------------|--------------------------------------------------------------------------|----------------------|---------------------------------------------------------------------------|-----------------------|------------------|------------------------|---------------------|
| Author                        | Representativeness of Exposed Cohort | Selection of Non-Exposed Cohort | Ascertainment Of Exposure | Demonstration That Outcome of Interest Was Not Present at Start of Study | Adjust for age       | Adjust for other factors such as tumor size, tumor grade, type of surgery | Assessment of outcome | Follow-up length | Loss to follow-up rate | Total Quality Score |
| Wang W, 2011 <sup>27</sup>    | 1                                    | 1                               | 1                         | 1                                                                        | 0                    | 0                                                                         | 1                     | 1                | 0                      | 6                   |
| Vallis KA, 2002 <sup>34</sup> | 0                                    | 1                               | 1                         | 0                                                                        | 0                    | 0                                                                         | 1                     | 1                | 1                      | 5                   |
| Rutter CE, 2014 <sup>33</sup> | 1                                    | 1                               | 1                         | 1                                                                        | 1                    | 1                                                                         | 1                     | 1                | 0                      | 8                   |
| Gutt R, 2008 <sup>35</sup>    | 0                                    | 1                               | 1                         | 1                                                                        | 0                    | 0                                                                         | 1                     | 1                | 0                      | 5                   |
| Park CK, 2011 <sup>36</sup>   | 0                                    | 1                               | 1                         | 1                                                                        | 0                    | 0                                                                         | 0                     | 1                | 1                      | 5                   |
| Darby SC, 2005 <sup>17</sup>  | 1                                    | 1                               | 1                         | 1                                                                        | 0                    | 0                                                                         | 1                     | 1                | 1                      | 7                   |
| Borger JH, 2007 <sup>37</sup> | 0                                    | 1                               | 1                         | 0                                                                        | 0                    | 0                                                                         | 1                     | 1                | 1                      | 5                   |
| Correa CR,                    | 0                                    | 1                               | 1                         | 1                                                                        | 0                    | 0                                                                         | 1                     | 1                | 1                      | 6                   |

|                                    |   |   |   |   |   |   |   |   |   |   |
|------------------------------------|---|---|---|---|---|---|---|---|---|---|
| 2007 <sup>39</sup>                 |   |   |   |   |   |   |   |   |   |   |
| Hooning MJ, 2006 <sup>40</sup>     | 0 | 1 | 1 | 0 | 1 | 0 | 1 | 1 | 1 | 6 |
| Boekel NB, 2014 <sup>32</sup>      | 1 | 1 | 1 | 1 | 1 | 0 | 1 | 1 | 1 | 8 |
| Bouchardy C, 2008 <sup>28</sup>    | 1 | 1 | 1 | 1 | 1 | 1 | 1 | 1 | 0 | 8 |
| Stokes EL, 2011 <sup>29</sup>      | 1 | 1 | 1 | 1 | 1 | 1 | 1 | 1 | 0 | 8 |
| McGale P, 2011 <sup>25</sup>       | 1 | 1 | 1 | 1 | 0 | 0 | 1 | 1 | 0 | 6 |
| Roychoudhuri R, 2007 <sup>24</sup> | 1 | 1 | 1 | 1 | 1 | 0 | 1 | 1 | 1 | 8 |
| Harris EE, 2006 <sup>41</sup>      | 1 | 1 | 1 | 1 | 1 | 1 | 1 | 1 | 1 | 9 |
| Gyenes G, 1998 <sup>22</sup>       | 0 | 1 | 1 | 1 | 1 | 0 | 1 | 1 | 1 | 8 |
| Tjessem KH, 2013 <sup>30</sup>     | 1 | 1 | 1 | 1 | 0 | 0 | 1 | 1 | 0 | 6 |
| Bouillon K, 2011 <sup>42</sup>     | 1 | 1 | 1 | 1 | 1 | 1 | 1 | 1 | 0 | 8 |
| Hooning MJ, 2007 <sup>31</sup>     | 0 | 1 | 1 | 0 | 1 | 0 | 1 | 1 | 1 | 6 |
| Rutqvist LE, 1990 <sup>21</sup>    | 1 | 1 | 1 | 1 | 0 | 0 | 1 | 1 | 1 | 7 |

|                                |   |   |   |   |   |   |   |   |   |   |
|--------------------------------|---|---|---|---|---|---|---|---|---|---|
| Paszat LF, 1999 <sup>13</sup>  | 1 | 1 | 1 | 1 | 1 | 1 | 1 | 1 | 0 | 8 |
| Nixon AJ, 1998 <sup>44</sup>   | 0 | 1 | 1 | 1 | 1 | 1 | 1 | 1 | 1 | 9 |
| Jagsi R, 2006 <sup>45</sup>    | 0 | 1 | 1 | 0 | 1 | 0 | 1 | 1 | 1 | 7 |
| Woodward WA, 2003 <sup>3</sup> | 0 | 1 | 1 | 0 | 0 | 0 | 1 | 1 | 1 | 5 |
| Caussa L, 2010 <sup>46</sup>   | 0 | 1 | 1 | 1 | 0 | 0 | 1 | 1 | 1 | 6 |

The quality of included studies was assessed by the Newcastle Ottawa scale. A study can be awarded a maximum of one star for each numbered item within the Selection and Outcome categories and a maximum of two stars for Comparability.

**Selection:** 1) Representativeness of exposed cohort: 1, study population truly or somewhat representative of a community/ population based study; 0, study population was sampled from a special population, ie. population from a company, hospital patients, data from the health insurance company or health examination organization, nurses, Adventist group.

2) Selection of non-exposed cohort: 1, drawn from the same community as the exposed cohort.

3) Ascertainment of exposure: 1, specific dietary assessment method of radiotherapy with validation; 0, no specific dietary assessment method or specific radiotherapy assessment method without validation

4) Demonstration that outcome was not present at start of study: 1, yes; 0, no.

**Comparability:** 1) 1, whether a study adjusted for age deliberately; 1, whether a study adjusted for other factors such as tumor size, tumor grade, type of surgery

**Outcome:** 1) Assessment of outcome: 1, cases were confirmed by medical records or record linkage; 0, self-reported.

2) Was follow-up long enough for outcomes to occur: 1, duration of follow-up  $\geq$  5 year; 0, if duration of follow-up  $<$  5 year.

3) Loss to follow-up rate: 1, complete follow-up or loss to follow up rate  $\leq$  20 %; 0, follow-up rate  $<$  80% or no description of those lost.

**Table S3. The quality assessment of included case-control studies using the Newcastle-Ottawa scale.**

| Author                         | Selection                   |                                 |                       |                        | Comparability  |                                                                           | Outcome               |                                                     |                   | Total Quality Score |
|--------------------------------|-----------------------------|---------------------------------|-----------------------|------------------------|----------------|---------------------------------------------------------------------------|-----------------------|-----------------------------------------------------|-------------------|---------------------|
|                                | Adequacy of case definition | Representativeness of the cases | Selection of Controls | Definition of Controls | Adjust for age | Adjust for other factors such as tumor size, tumor grade, type of surgery | Assessment of outcome | Same method of ascertainment for cases and controls | Non-Response rate |                     |
| Dubois C, 2010 <sup>38</sup>   | 1                           | 1                               | 0                     | 1                      | 0              | 0                                                                         | 1                     | 1                                                   | 0                 | 5                   |
| Boerman LM, 2014 <sup>43</sup> | 1                           | 1                               | 1                     | 1                      | 1              | 1                                                                         | 1                     | 1                                                   | 0                 | 8                   |
| Geiger A, 2005 <sup>47</sup>   | 1                           | 1                               | 1                     | 1                      | 1              | 1                                                                         | 1                     | 1                                                   | 0                 | 8                   |

The quality of included studies was assessed by the Newcastle Ottawa scale. A study can be awarded a maximum of one star for each numbered item within the Selection and Outcome categories and a maximum of two stars for Comparability.

**Selection:** 1) Adequacy of case definition: 1, cases were confirmed by medical records or record linkage; 0, self-reported.

2) Representativeness of the cases: 1, consecutive or obviously representative series of cases; 0, potential for selection biases or not stated.

3) Selection of Controls: 1, community controls; 0, hospital controls or no description.

4) Definition of Controls: 1, no history of cardiovascular events; 0, no description of source.

**Comparability:** 1) 1, whether a study adjusted for age deliberately; 1, whether a study adjusted for other factors such as tumor size, tumor grade, type of surgery.

**Outcome:** 1) Assessment of outcome: 1, cardiovascular events were confirmed by medical records or record linkage; 0, self-reported.

2) Same method of ascertainment for cases and controls: 1, yes; 0, no.

3) Non-Response rate: 1, same rate for both groups; 0, non respondents described rate different and no designation.

**Table S4. The quality assessment of included randomized controlled studies using the Modified Jadad Scores.**

| <b>Author</b>                               | <b>Randomization</b> | <b>Concealment of allocation</b> | <b>Withdrawals and dropouts</b> | <b>Total</b> |
|---------------------------------------------|----------------------|----------------------------------|---------------------------------|--------------|
| EBCTCG report <sup>1</sup>                  | 2                    | 2                                | 1                               | 5            |
| Valagussa P <sup>2</sup>                    | 1                    | 2                                | 1                               | 4            |
| Stockholm Breast Cancer Trial <sup>4</sup>  | 1                    | 2                                | 0                               | 3            |
| Cuzick J <sup>5</sup>                       | 1                    | 1                                | 1                               | 3            |
| SSBCG Trial <sup>6</sup>                    | 2                    | 1                                | 1                               | 4            |
| DBC 82b and 82c Trials <sup>7</sup>         | 2                    | 2                                | 1                               | 5            |
| Cancer Research Campaign Trial <sup>8</sup> | 1                    | 1                                | 1                               | 3            |
| Oslo study <sup>9</sup>                     | 2                    | 1                                | 1                               | 4            |
| CRC Trial <sup>10</sup>                     | 1                    | 1                                | 1                               | 3            |
| NCCTG Trial <sup>12</sup>                   | 1                    | 2                                | 1                               | 4            |
| Jones JM <sup>11</sup>                      | 1                    | 1                                | 1                               | 3            |

**Randomization:** 0, not randomized or inappropriate method of randomization; 1, the study was described as randomized; 2, the method of randomization was described and it was appropriate.

**Concealment of allocation:** 0, not describe the method of allocation concealment; 1, the study was described as using allocation concealment method; 2, the method of allocation concealment was described appropriately.

**Double blinding:** 0, no blind or inappropriate method of blinding; 1, the study was described as double blind; 2, the method of double blinding was described and it was appropriate.

**Withdrawals and dropouts:** 0, not describe the follow-up; 1, a description of withdrawals and dropouts.



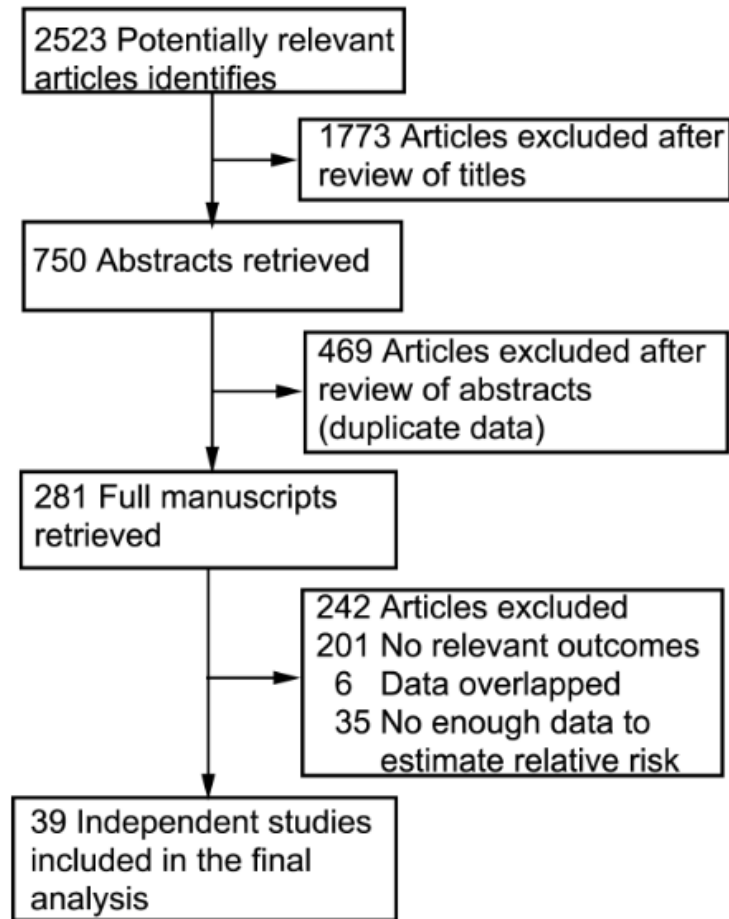

Figure S1. Flowchart of the selection of studies included in meta-analysis.

(A) Coronary heart disease in left-sided versus right-sided radiotherapy

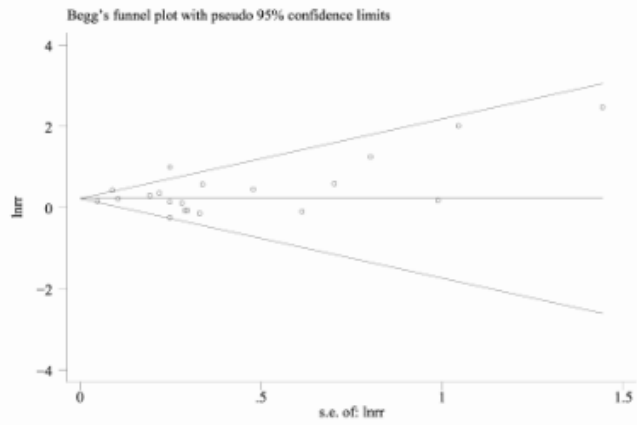

(B) Cardiac death in left-sided versus right-sided radiotherapy

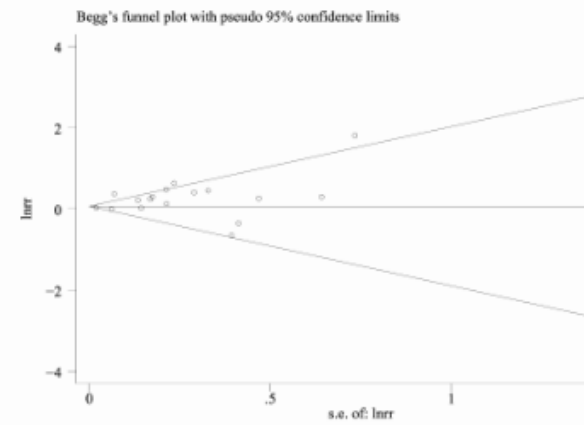

(C) Coronary heart disease in radiotherapy versus no radiotherapy

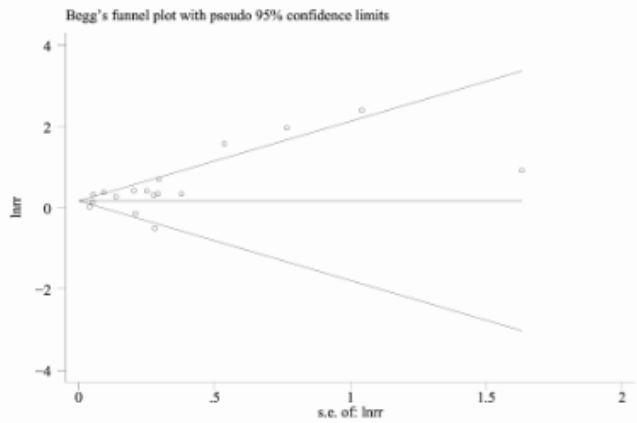

(D) Cardiac death in radiotherapy versus no radiotherapy

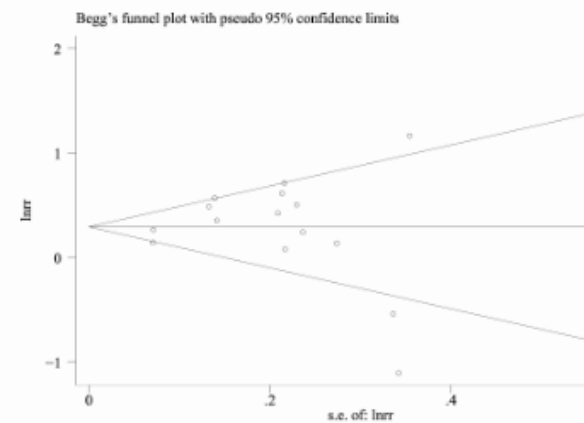

Figure S2. Funnel plots showing association of coronary heart disease and cardiac death with radiotherapy.

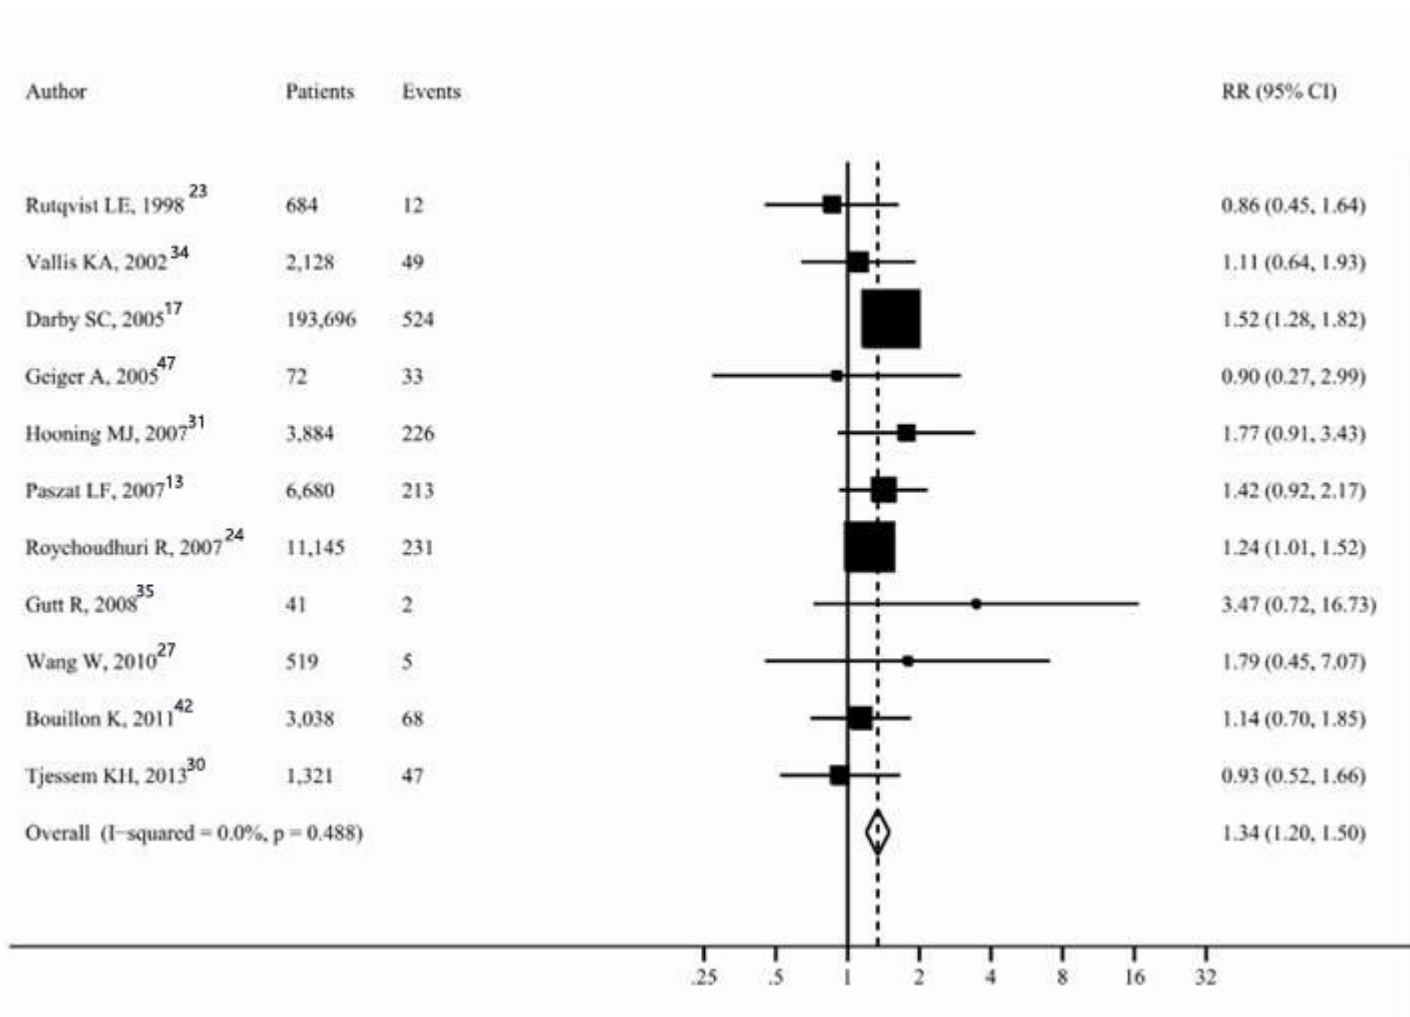

Figure S3. Forest plot for risk of myocardial infarction and death from coronary heart disease in patients with left-sided radiotherapy versus right-sided radiotherapy.

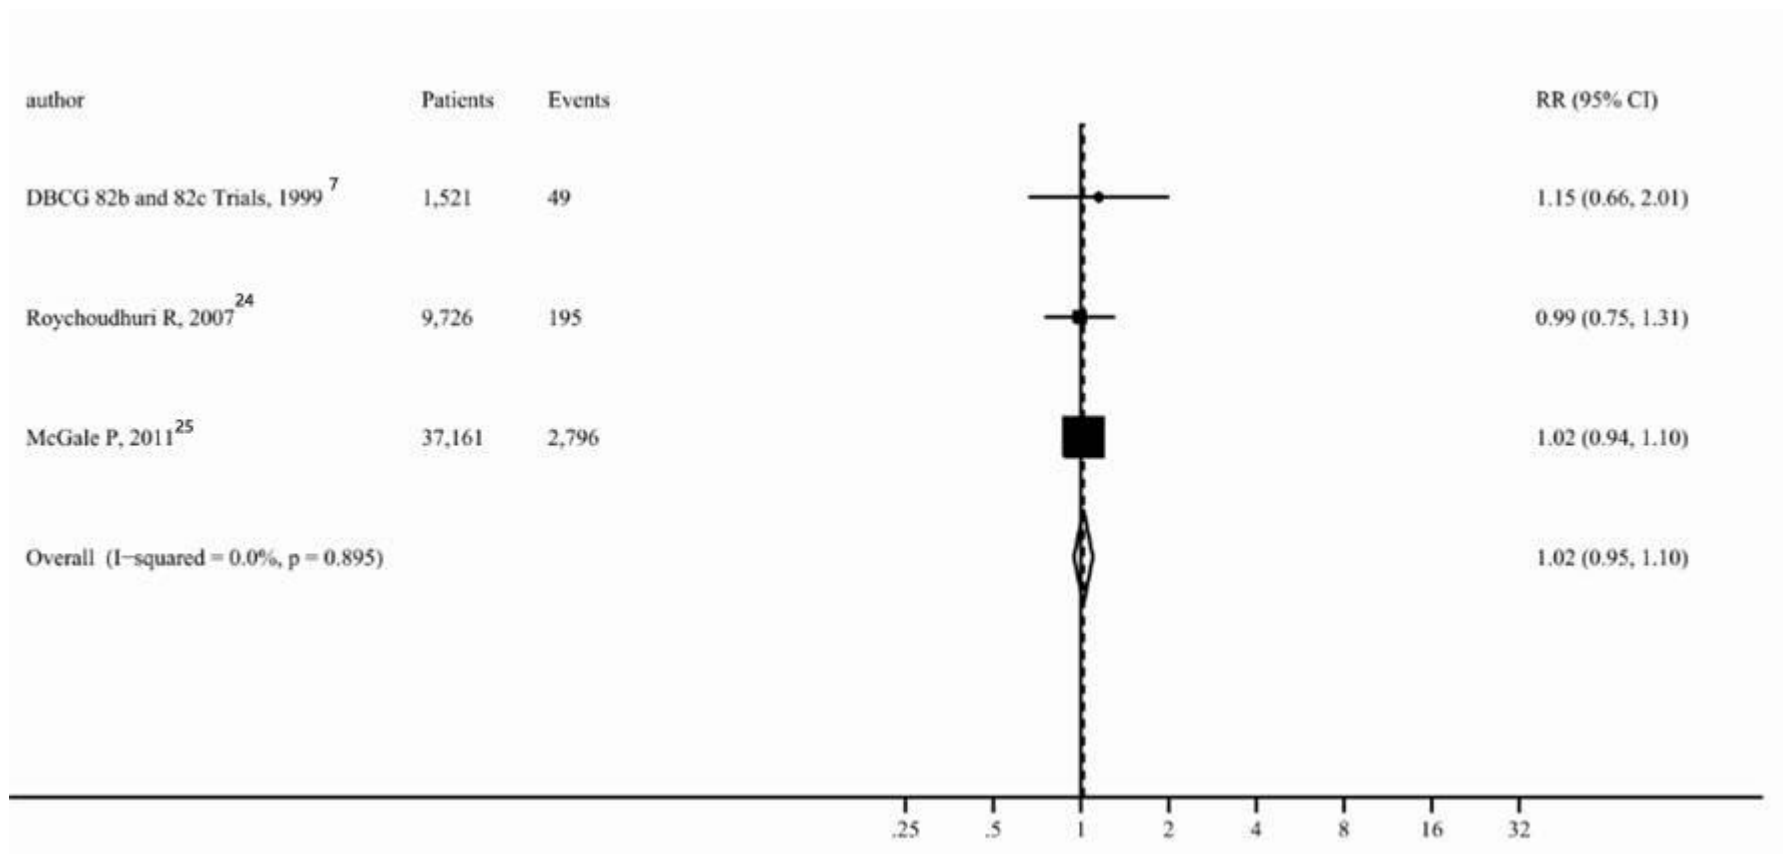

Figure S4. Forest plot for risk of coronary heart disease in unirradiated patients with left-sided versus right-sided breast cancer.

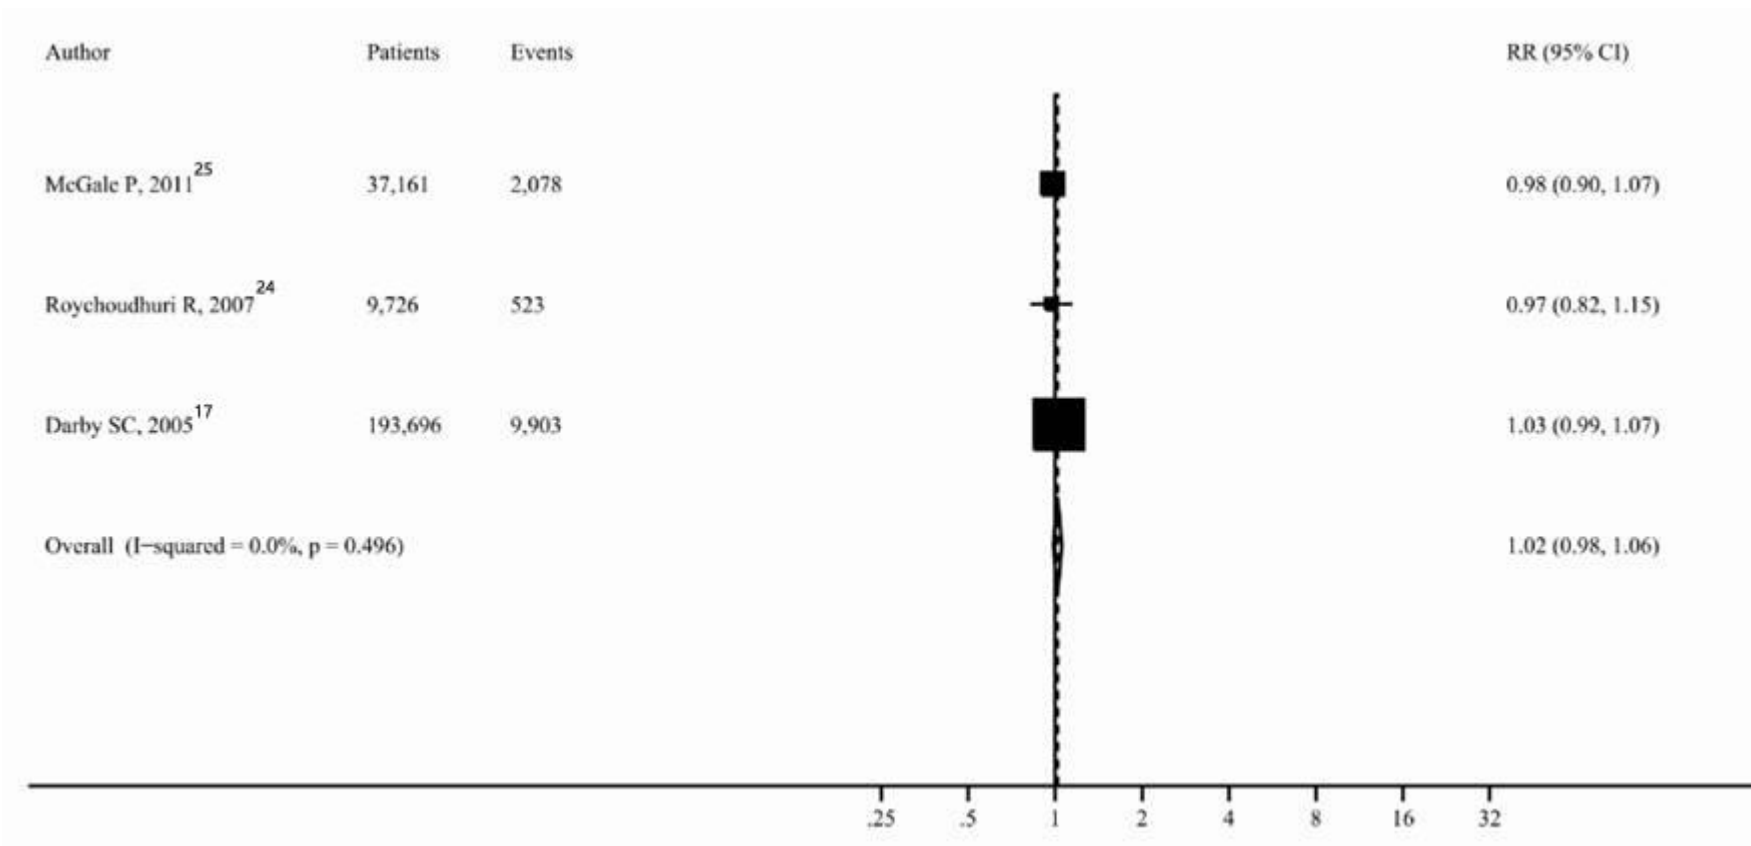

Figure S5. Forest plot for risk of cardiac death in unirradiated patients with left-sided versus right-sided breast cancer.

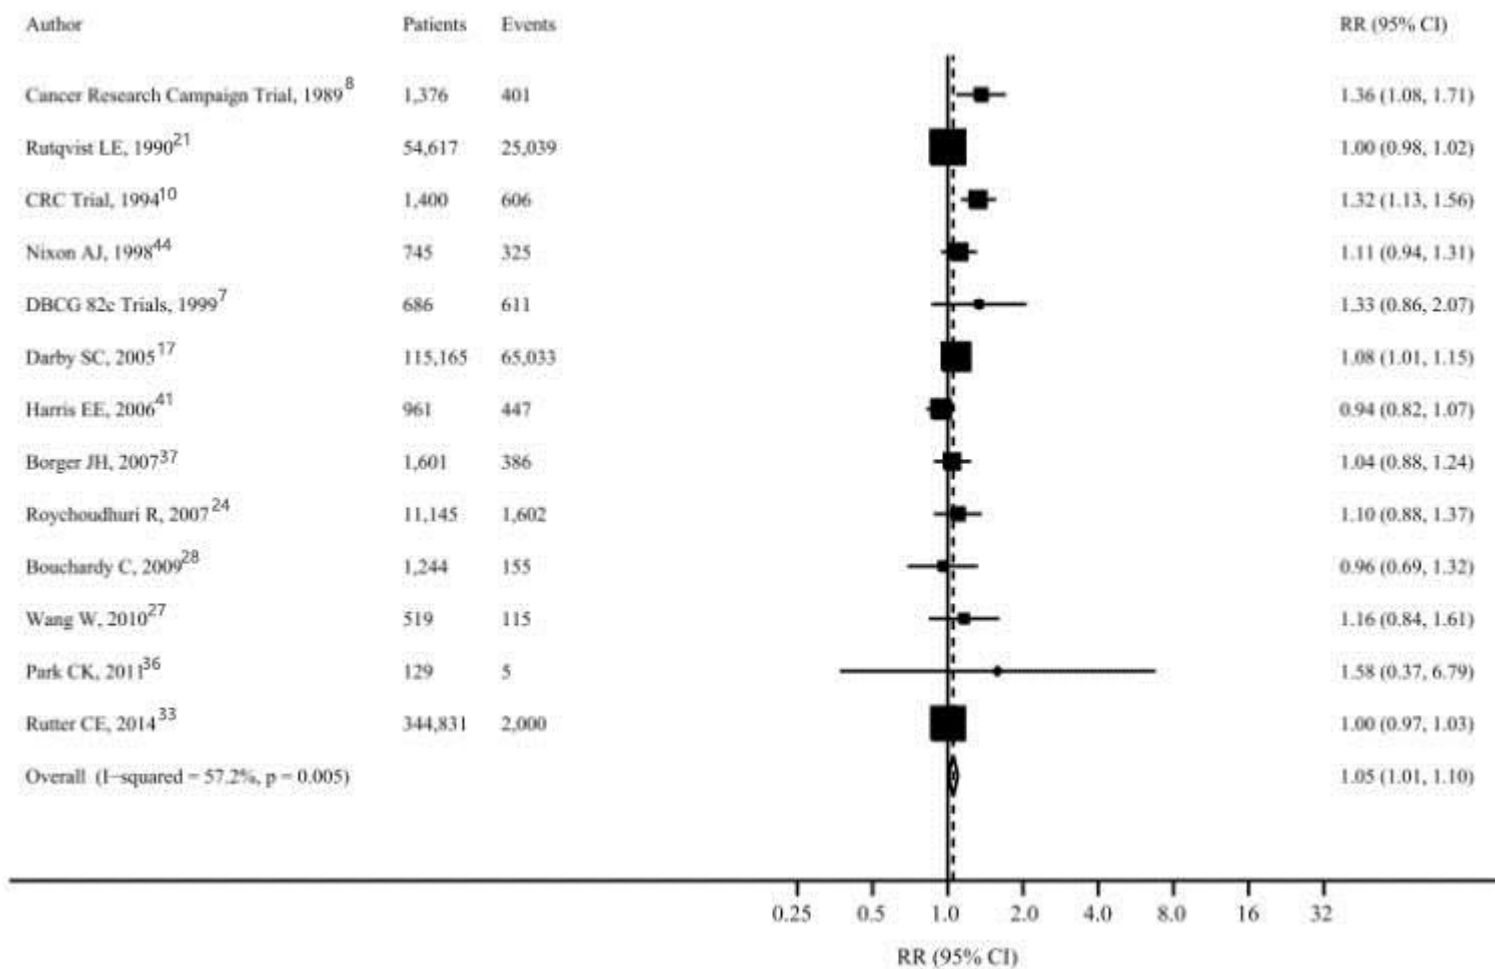

Figure S6. Forest plot for risk of death from any cause in patients with left-sided radiotherapy versus right-sided radiotherapy.

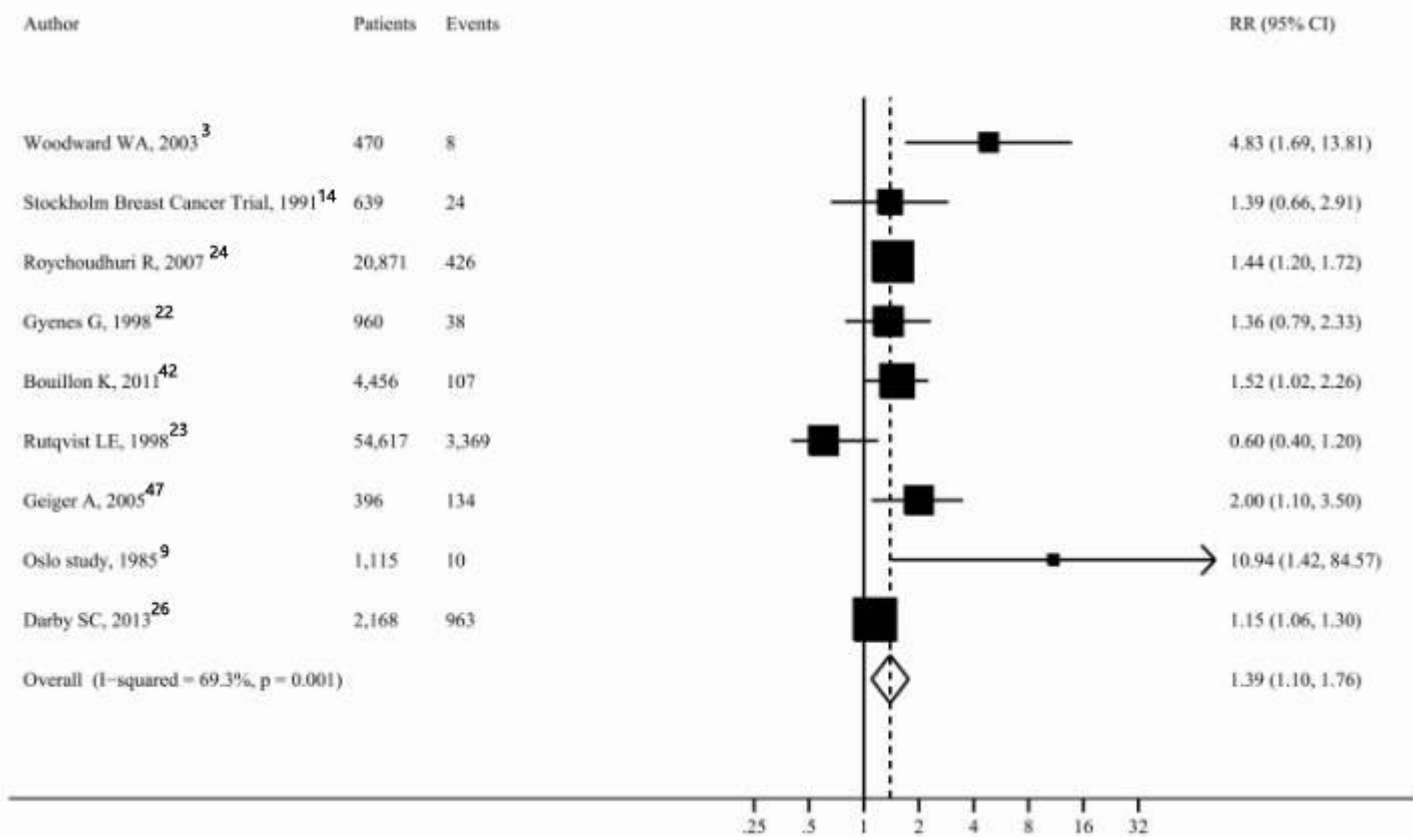

Figure S7. Forest plot for risk of myocardial infarction and death from coronary heart disease in patients with radiotherapy versus without radiotherapy.

### Supplemental References:

1. Clarke M, Collins R, Darby S, Davies C, Elphinstone P, Evans V, Godwin J, Gray R, Hicks C, James S, MacKinnon E, McGale P, McHugh T, Peto R, Taylor C, Wang Y. Effects of radiotherapy and of differences in the extent of surgery for early breast cancer on local recurrence and 15-year survival: an overview of the randomised trials. *LANCET*. 2005;366:2087-2106.
2. Valagussa P, Zambetti M, Biasi S, Moliterni A, Zucali R, Bonadonna G. Cardiac effects following adjuvant chemotherapy and breast irradiation in operable breast cancer. *ANN ONCOL*. 1994;5:209-216.
3. Woodward WA, Strom EA, McNeese MD, Perkins GH, Outlaw EL, Hortobagyi GN, Buzdar AU, Buchholz TA. Cardiovascular death and second non-breast cancer malignancy after postmastectomy radiation and doxorubicin-based chemotherapy. *Int J Radiat Oncol Biol Phys*. 2003;57:327-335.
4. Rutqvist LE, Lax I, Fornander T, Johansson H. Cardiovascular mortality in a randomized trial of adjuvant radiation therapy versus surgery alone in primary breast cancer. *Int J Radiat Oncol Biol Phys*. 1992;22:887-896.
5. Cuzick J, Stewart H, Rutqvist L, Houghton J, Edwards R, Redmond C, Peto R, Baum M, Fisher B, Host H, Et A. Cause-specific mortality in long-term survivors of breast cancer who participated in trials of radiotherapy. *J CLIN ONCOL*. 1994;12:447-453.
6. Killander F, Anderson H, Kjellen E, Malmstrom P. Increased cardio and cerebrovascular mortality in breast cancer patients treated with postmastectomy radiotherapy--25 year follow-up of a randomised trial from the South Sweden Breast Cancer Group. *EUR J CANCER*. 2014;50:2201-2210.
7. Hojris I, Overgaard M, Christensen JJ, Overgaard J. Morbidity and mortality of ischaemic heart disease in high-risk breast-cancer patients after adjuvant postmastectomy systemic treatment with or without radiotherapy: analysis of DBCG 82b and 82c randomised trials. Radiotherapy Committee of the Danish Breast Cancer Cooperative Group. *LANCET*. 1999;354:1425-1430.
8. Haybittle JL, Brinkley D, Houghton J, A'Hern RP, Baum M. Postoperative radiotherapy and late mortality: evidence from the Cancer Research Campaign trial for early breast cancer. *BMJ*. 1989;298:1611-1614.
9. Host H, Brennhovd IO, Loeb M. Postoperative radiotherapy in breast cancer--long-term results from the Oslo study. *Int J Radiat Oncol Biol Phys*. 1986;12:727-732.
10. Houghton J, Baum M, Haybittle JL. Role of radiotherapy following total mastectomy in patients with early breast cancer. The Closed Trials Working Party of the CRC Breast Cancer Trials Group. *WORLD J SURG*. 1994;18:117-122.
11. Jones JM, Ribeiro GG. Mortality patterns over 34 years of breast cancer patients in a clinical trial of post-operative radiotherapy. *CLIN RADIOL*. 1989;40:204-208.



12. Halyard MY, Pisansky TM, Dueck AC, Suman V, Pierce L, Solin L, Marks L, Davidson N, Martino S, Kaufman P, Kutteh L, Dakhil SR, Perez EA. Radiotherapy and adjuvant trastuzumab in operable breast cancer: tolerability and adverse event data from the NCCTG Phase III Trial N9831. *J CLIN ONCOL*. 2009;27:2638-2644.
13. Paszat LF, Mackillop WJ, Groome PA, Schulze K, Holowaty E. Mortality from myocardial infarction following postlumpectomy radiotherapy for breast cancer: a population-based study in Ontario, Canada. *Int J Radiat Oncol Biol Phys*. 1999;43:755-762.
14. Patt DA, Goodwin JS, Kuo YF, Freeman JL, Zhang DD, Buchholz TA, Hortobagyi GN, Giordano SH. Cardiac morbidity of adjuvant radiotherapy for breast cancer. *J CLIN ONCOL*. 2005;23:7475-7482.
15. Pinder MC, Duan Z, Goodwin JS, Hortobagyi GN, Giordano SH. Congestive heart failure in older women treated with adjuvant anthracycline chemotherapy for breast cancer. *J CLIN ONCOL*. 2007;25:3808-3815.
16. Harlan LC, Klabunde CN, Ambs AH, Gibson T, Bernstein L, McTiernan A, Meeske K, Baumgartner KB, Ballard-Barbash R. Comorbidities, therapy, and newly diagnosed conditions for women with early stage breast cancer. *J CANCER SURVIV*. 2009;3:89-98.
17. Darby SC, McGale P, Taylor CW, Peto R. Long-term mortality from heart disease and lung cancer after radiotherapy for early breast cancer: prospective cohort study of about 300,000 women in US SEER cancer registries. *LANCET ONCOL*. 2005;6:557-565.
18. Henson KE, McGale P, Taylor C, Darby SC. Radiation-related mortality from heart disease and lung cancer more than 20 years after radiotherapy for breast cancer. *Br J Cancer*. 2013;108:179-182.
19. Doyle JJ, Neugut AI, Jacobson JS, Wang J, McBride R, Grann A, Grann VR, Hershman D. Radiation therapy, cardiac risk factors, and cardiac toxicity in early-stage breast cancer patients. *Int J Radiat Oncol Biol Phys*. 2007;68:82-93.
20. Giordano SH, Kuo YF, Freeman JL, Buchholz TA, Hortobagyi GN, Goodwin JS. Risk of cardiac death after adjuvant radiotherapy for breast cancer. *J Natl Cancer Inst*. 2005;97:419-424.
21. Rutqvist LE, Johansson H. Mortality by laterality of the primary tumour among 55,000 breast cancer patients from the Swedish Cancer Registry. *Br J Cancer*. 1990;61:866-868.
22. Gyenes G, Rutqvist LE, Liedberg A, Fornander T. Long-term cardiac morbidity and mortality in a randomized trial of pre- and postoperative radiation therapy versus surgery alone in primary breast cancer. *RADIOTHER ONCOL*. 1998;48:185-190.
23. Rutqvist LE, Liedberg A, Hammar N, Dalberg K. Myocardial infarction among women with

- early-stage breast cancer treated with conservative surgery and breast irradiation. *Int J Radiat Oncol Biol Phys.* 1998;40:359-363.
24. Roychoudhuri R, Robinson D, Putcha V, Cuzick J, Darby S, Moller H. Increased cardiovascular mortality more than fifteen years after radiotherapy for breast cancer: a population-based study. *BMC CANCER.* 2007;7:9.
25. McGale P, Darby SC, Hall P, Adolfsson J, Bengtsson NO, Bennet AM, Fornander T, Gigante B, Jensen MB, Peto R, Rahimi K, Taylor CW, Ewertz M. Incidence of heart disease in 35,000 women treated with radiotherapy for breast cancer in Denmark and Sweden. *RADOTHER ONCOL.* 2011;100:167-175.
26. Darby SC, Ewertz M, McGale P, Bennet AM, Blom-Goldman U, Bronnum D, Correa C, Cutter D, Gagliardi G, Gigante B, Jensen MB, Nisbet A, Peto R, Rahimi K, Taylor C, Hall P. Risk of ischemic heart disease in women after radiotherapy for breast cancer. *N Engl J Med.* 2013;368:987-998.
27. Wang W, O'Connell D, Stuart K, Boyages J. Analysis of 10-year cause-specific mortality of patients with breast cancer treated in New South Wales in 1995. *J Med Imaging Radiat Oncol.* 2011;55:516-525.
28. Bouchardy C, Rapiti E, Usel M, Majno SB, Vlastos G, Benhamou S, Miralbell R, Neyroud-Caspar I, Verkooyen HM, Vinh-Hung V. Excess of cardiovascular mortality among node-negative breast cancer patients irradiated for inner-quadrant tumors. *ANN ONCOL.* 2010;21:459-465.
29. Stokes EL, Tyldesley S, Woods R, Wai E, Olivetto IA. Effect of nodal irradiation and fraction size on cardiac and cerebrovascular mortality in women with breast cancer treated with local and locoregional radiotherapy. *Int J Radiat Oncol Biol Phys.* 2011;80:403-409.
30. Tjessem KH, Johansen S, Malinen E, Reinertsen KV, Danielsen T, Fossa SD, Fossa A. Long-term cardiac mortality after hypofractionated radiation therapy in breast cancer. *Int J Radiat Oncol Biol Phys.* 2013;87:337-343.
31. Hooning MJ, Botma A, Aleman BM, Baaijens MH, Bartelink H, Klijn JG, Taylor CW, van Leeuwen FE. Long-term risk of cardiovascular disease in 10-year survivors of breast cancer. *J Natl Cancer Inst.* 2007;99:365-375.
32. Boekel NB, Schaapveld M, Gietema JA, Rutgers EJ, Versteegh MI, Visser O, Aleman BM, van Leeuwen FE. Cardiovascular morbidity and mortality after treatment for ductal carcinoma in situ of the breast. *J Natl Cancer Inst.* 2014;106.
33. Rutter CE, Chagpar AB, Evans SB. Breast cancer laterality does not influence survival in a large modern cohort: implications for radiation-related cardiac mortality. *Int J Radiat Oncol Biol Phys.* 2014;90:329-334.

34. Vallis KA, Pintilie M, Chong N, Holowaty E, Douglas PS, Kirkbride P, Wielgosz A. Assessment of coronary heart disease morbidity and mortality after radiation therapy for early breast cancer. *J CLIN ONCOL*. 2002;20:1036-1042.
35. Gutt R, Correa CR, Hwang WT, Solin LJ, Litt HI, Ferrari VA, Harris EE. Cardiac morbidity and mortality after breast conservation treatment in patients with early-stage breast cancer and preexisting cardiac disease. *CLIN BREAST CANCER*. 2008;8:443-448.
36. Park CK, Li X, Starr J, Harris EE. Cardiac morbidity and mortality in women with ductal carcinoma in situ of the breast treated with breast conservation therapy. *BREAST J*. 2011;17:470-476.
37. Borger JH, Hoening MJ, Boersma LJ, Snijders-Keilholz A, Aleman BM, Lintzen E, van Brussel S, van der Toorn PP, Alwhouhayb M, van Leeuwen FE. Cardiotoxic effects of tangential breast irradiation in early breast cancer patients: the role of irradiated heart volume. *Int J Radiat Oncol Biol Phys*. 2007;69:1131-1138.
38. Dubois CL, Pappas C, Belmans A, Erven K, Adriaenssens T, Sinnaeve P, Coosemans M, Kayaert P, Weltens C, Desmet W. Clinical outcome of coronary stenting after thoracic radiotherapy: a case-control study. *HEART*. 2010;96:678-682.
39. Correa CR, Litt HI, Hwang WT, Ferrari VA, Solin LJ, Harris EE. Coronary artery findings after left-sided compared with right-sided radiation treatment for early-stage breast cancer. *J CLIN ONCOL*. 2007;25:3031-3037.
40. Hoening MJ, Aleman BM, van Rosmalen AJ, Kuenen MA, Klijn JG, van Leeuwen FE. Cause-specific mortality in long-term survivors of breast cancer: A 25-year follow-up study. *Int J Radiat Oncol Biol Phys*. 2006;64:1081-1091.
41. Harris EE, Correa C, Hwang WT, Liao J, Litt HI, Ferrari VA, Solin LJ. Late cardiac mortality and morbidity in early-stage breast cancer patients after breast-conservation treatment. *J CLIN ONCOL*. 2006;24:4100-4106.
42. Bouillon K, Haddy N, Delalogue S, Garbay JR, Garsi JP, Brindel P, Mousannif A, Le MG, Labbe M, Arriagada R, Jouglu E, Chavaudra J, Diallo I, Rubino C, de Vathaire F. Long-term cardiovascular mortality after radiotherapy for breast cancer. *J AM COLL CARDIOL*. 2011;57:445-452.
43. Boerman LM, Berendsen AJ, van der Meer P, Maduro JH, Berger MY, de Bock GH. Long-term follow-up for cardiovascular disease after chemotherapy and/or radiotherapy for breast cancer in an unselected population. *SUPPORT CARE CANCER*. 2014;22:1949-1958.
44. Nixon AJ, Manola J, Gelman R, Bornstein B, Abner A, Hetelekidis S, Recht A, Harris JR. No long-term increase in cardiac-related mortality after breast-conserving surgery and radiation therapy using modern techniques. *J CLIN ONCOL*. 1998;16:1374-1379.

45. Jagsi R, Griffith KA, Koelling T, Roberts R, Pierce LJ. Rates of myocardial infarction and coronary artery disease and risk factors in patients treated with radiation therapy for early-stage breast cancer. *CANCER-AM CANCER SOC.* 2007;109:650-657.
46. Caussa L, Kirova YM, Gault N, Pierga JY, Savignoni A, Campana F, Dendale R, Fourquet A, Bollet MA. The acute skin and heart toxicity of a concurrent association of trastuzumab and locoregional breast radiotherapy including internal mammary chain: a single-institution study. *EUR J CANCER.* 2011;47:65-73.
47. Geiger AM, Chen W, Bernstein L. Myocardial infarction risk and tamoxifen therapy for breast cancer. *Br J Cancer.* 2005;92:1614-1620.
